# Supplementary material for: Pioneering gut health improvements in piglets with phytogenic feed additives
Source: PubMed Central journal article supplement (PMC10794284; doi:10.1007/s00253-023-12925-2), 2024-01-17
Supplement: 253_2023_12925_MOESM1_ESM.pdf [file 253_2023_12925_MOESM1_ESM.pdf]

# Applied Microbiology and Biotechnology

## Supplementary Material

### **Pioneering gut health improvements in piglets with phytogetic feed additives**

Sung Joon Yu<sup>1</sup>, Andrew Morris<sup>2</sup>, Advait Kayal<sup>1</sup>, Ivan Milošević<sup>3</sup>, Thi Thu Hao Van<sup>1,4</sup>, Yadav Sharma Bajagai<sup>1</sup> and Dragana Stanley<sup>1§</sup>

<sup>1</sup>Central Queensland University, Institute for Future Farming Systems, Rockhampton, Queensland 4701, Australia

<sup>2</sup>Riverbend Pork Group, 487-489 Ruthven Street, Toowoomba 4350, Australia

<sup>3</sup>University of Belgrade, Faculty of Veterinary Medicine, Bulevar Oslobođenja 18, 11999 Belgrade, Serbia

<sup>4</sup>School of Science, RMIT University, Bundoora, VIC 3083, Australia

<sup>§</sup>Corresponding author

Dragana Stanley

Central Queensland University

Institute for Future Farming Systems

Central Queensland Innovation and Research Precinct (CQIRP)

Rockhampton QLD 4701, Australia

Telephone: +61 7 49302079

E-mail: [D.Stanley@cqu.edu.au](mailto:D.Stanley@cqu.edu.au)

ORCID:

SJY: 0000-0001-8319-50107;

AK: 0000-0002-0048-1516;

YSB: 0000-0002-3043-071X;

DS: 0000-0001-7019-4726

**Supplementary Table S1.** Performance data of weaner-to-grower pigs fed with and without phytogetic additives.

| Age | Measure                     | Control |       | Treatment |       |
|-----|-----------------------------|---------|-------|-----------|-------|
| W3  | Average body weight (kg)    | 6.486   |       | 6.218     |       |
|     | SD                          | 1.4     |       | 1.444     |       |
| W8  | Average body weight (kg)    | 20.286  |       | 20.382    |       |
|     | SD                          | 3.647   |       | 4.752     |       |
|     |                             | W3      | W8    | W3        | W8    |
|     | Maximum body weight (kg)    | 10.6    | 29.7  | 8.9       | 29.65 |
|     | Minimum body weight (kg)    | 3.6     | 12.9  | 3.6       | 11.35 |
|     | 25 <sup>th</sup> percentile | 5.4     | 17.74 | 5.175     | 16.98 |
|     | 75 <sup>th</sup> percentile | 7.35    | 22.46 | 7.1       | 23.15 |
|     | Weight gain (kg)            | 13.80   |       | 14.16     |       |

**Supplementary Table S2.** The SIMPER analysis was conducted on faecal samples at week 8 with contribution of individual genus to the dissimilarity between control and treatment.

| Species                            | Control | Treatment |
|------------------------------------|---------|-----------|
| <i>Prevotella</i>                  | 0.2     | 0.22      |
| <i>Muribaculaceae</i>              | 0.08    | 0.09      |
| <i>Streptococcus</i>               | 0.04    | 0.03      |
| <i>Lactobacillus</i>               | 0.04    | 0.04      |
| Others                             | 0.1     | 0.08      |
| <i>Roseburia</i>                   | 0.01    | 0.03      |
| <i>Clostridium sensu stricto 1</i> | 0.03    | 0.02      |
| <i>UCG-005</i>                     | 0.04    | 0.03      |
| <i>Faecalibacterium</i>            | 0.04    | 0.04      |
| <i>Megasphaera</i>                 | 0.02    | 0.02      |
| <i>Subdoligranulum</i>             | 0.05    | 0.05      |
| <i>Alloprevotella</i>              | 0.02    | 0.02      |
| <i>UCG-002</i>                     | 0.02    | 0.02      |

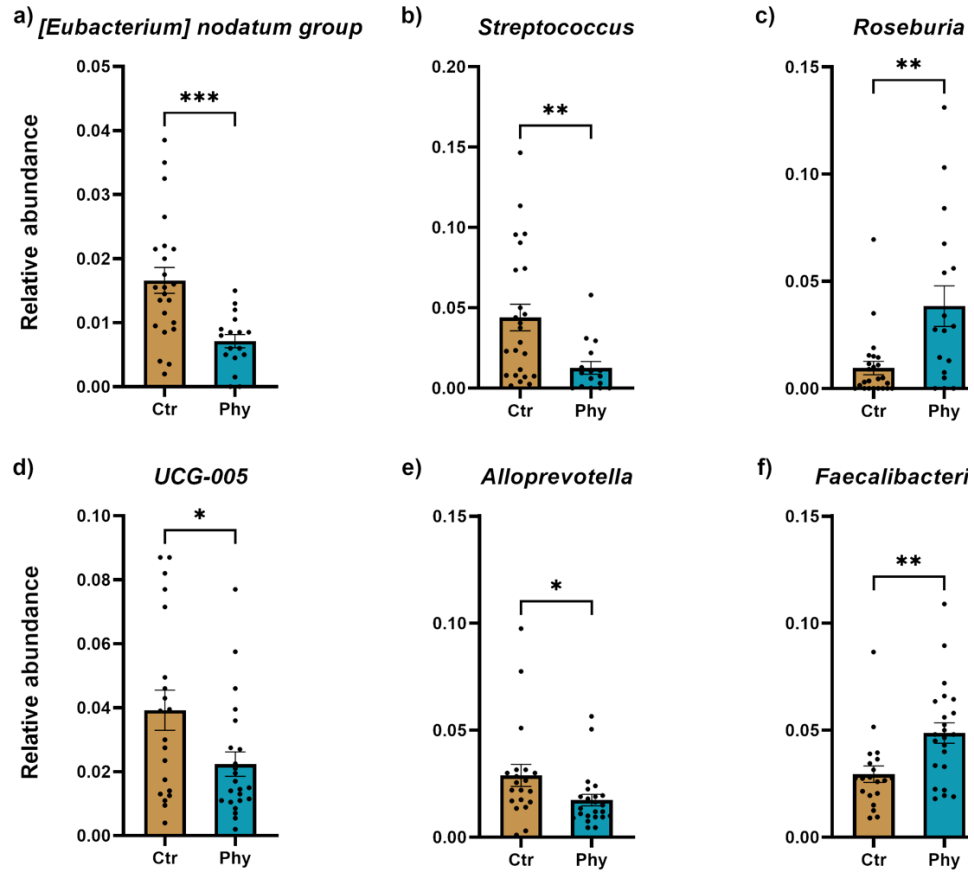

**Supplementary Fig. S1** Comparative analysis of genus-level relative abundance in faecal samples from male and female piglets at week 8. Panels a) to c) represents genera differentially abundant in male piglets, while panels d) to f) represent those in female piglets when comparing Ctr to Phy groups. a) *[Eubacterium] nodatum group*, b) *Streptococcus*, and c) *Roseburia* show significant differences in males; d) *UCG-005*, e) *Alloprevotella*, and f) *Faecalibacterium* are represented for females. Significance levels are denoted: \*  $p < 0.05$ , \*\*  $p < 0.001$ , \*\*\*  $p < 0.0001$ .

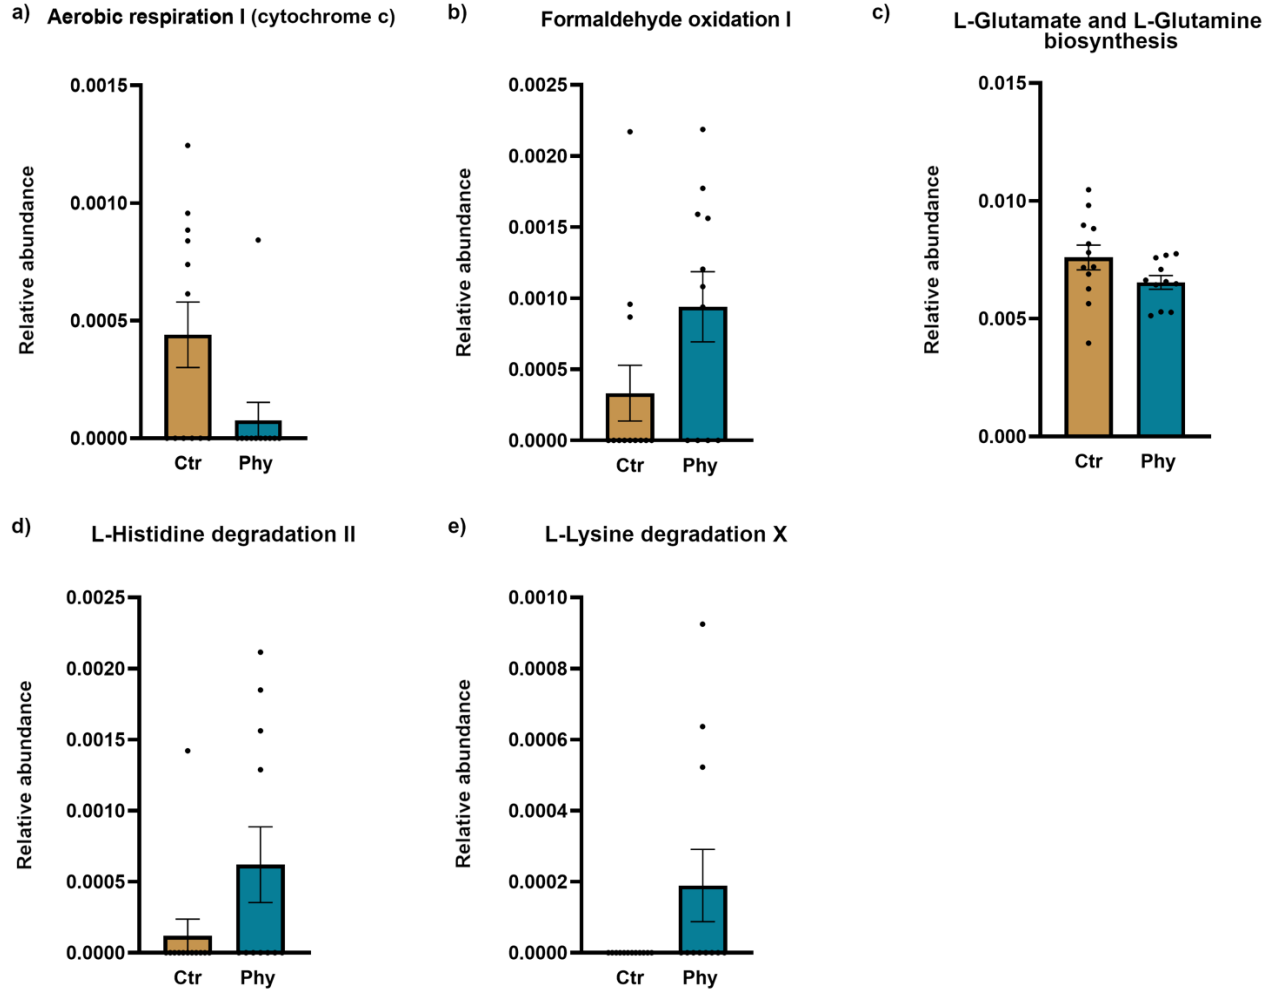

**Supplementary Fig. S2** Examination of marginally altered metabolic pathways in metagenomic analysis between Ctr and Phy groups. a) Aerobic respiration I (cytochrome), b) Formaldehyde oxidation I, c) L-Glutamate and L-Glutamine biosynthesis, d) L-Histidine degradation II, and e) L-Lysine degradation X. Each bar represents the mean relative abundance of a pathway, with error bars indicating the standard error of the mean.
